# Supplementary material
Source: publisher figshare collection journal article supplement (https://sage.figshare.com/ndownloader/files/23454521)
Supplement: Supplementary file 1 [file 23454521]

# ICAR-NATIONAL RESEARCH CENTRE ON EQUINES SIRSA ROAD, HISAR

## IAEC, ICAR-NRCE, Meeting 2019-Proceedings

NRCE/CPCSEA/2018-19 DATED

07/02/2019

A MEETING OF THE Institute Animal Ethics Committee (IAEC) was held on 07/02/2019 at 1100 AM under the Chairmanship of Dr Nitin Virmani, Principal Scientist, NRCE, Hisar in the Committee room of National Research Centre on Equines, Hisar, Haryana to examine the requirement of experimental animals, in various research products of the NRCE, Hisar. The IAEC critically examined the proposals. Following officials were present in the meeting:

- Dr Nitin Virmani, Chairman, IAEC (NRCE, Hisar)
- Dr Harbans Lal- Main CPCSEA Nominee
- Mr Anil Kamboj- (Non-Scientific Socially Aware Member)
- Dr Sanjay Kumar, Principal Scientist, Veterinarian
- Dr Balwinder Kumar, Principal Scientist, I/c Animal House
- Dr R K Vaid, Scientist from different biological Discipline, Member Secretary
- Dr Ramesh Dedar, Scientist, Scientist from different discipline

### Proposals submitted by scientists for the consideration and approval to IAEC

| S.No | Name of the project                                                                                                                                  | Project | Principal Investigator | Requirement                                                                         | Approved/ Not Approved |
|------|------------------------------------------------------------------------------------------------------------------------------------------------------|---------|------------------------|-------------------------------------------------------------------------------------|------------------------|
| 1.   | Nanobased therapeutic interventions against osteoarthritis                                                                                           | ICAR    | Anju Manuja            | Mice (DBA-1): 42                                                                    | Approved               |
| 2.   | Development of sensitive and specific diagnostic assays for detection of <i>Trypanosoma evansi</i> infection in animals using modern molecular tools | ICAR    | Rajender Kumar         | Mice (Swiss Albino-72 and BALB/c-20), Rabbit (New Zealand)-3                        | Approved               |
| 3.   | CRP on vaccines and diagnostics- Development of refined vaccine for equine herpesvirus 1 infection                                                   | ICAR    | Nitin Virmani          | Horses/ponies (for collection of blood only)- 24<br><i>Continued from last year</i> | Approved*              |
| 4.   | Comparative evaluation of immunogenicity and protective efficacy of modified live Equine Herpes Virus -1 vaccine candidate (s) in murine model       | ICAR    | Nitin Virmani          | BALB/c mice- 312                                                                    | Approved               |

|    |                                                                                                                                                                          |      |                       |                                                                                                                                                                                                                              |                                                                              |
|----|--------------------------------------------------------------------------------------------------------------------------------------------------------------------------|------|-----------------------|------------------------------------------------------------------------------------------------------------------------------------------------------------------------------------------------------------------------------|------------------------------------------------------------------------------|
| 5. | Generation of recombinant <i>Equine Herpesviruses</i> 1 through BAC mediated deletion mutagenesis and their comparative pathogenicity and immunogenicity in murine model | ICAR | Nitin Virmani         | BALB/c mice – 90                                                                                                                                                                                                             | Approved                                                                     |
| 6. | Prevalence studies for porcine respiratory viruses and development of the repository                                                                                     | ICAR | B.C.Bera              | Rabbit- 4                                                                                                                                                                                                                    | Approved                                                                     |
| 7. | Surveillance monitoring and control of emerging and existing diseases of equines                                                                                         | ICAR | H S Singha            | Guinea Pig- 40<br>Rabbit- 4<br>Swiss Albino Mice either sex- 90<br>Poultry- 10<br>Mother Mice with suckling babies- 100<br>BALB/c mice- 40<br>Geese- 12<br>Sheep- 1* (for blood only for making media for bacteriology work) | Approved                                                                     |
| 8. | Phenotypic and genotypic authentication and preservation of network bacterial isolates”                                                                                  | ICAR | R K Vaid              | Balb/C Mice:100<br>Rabbit: 2                                                                                                                                                                                                 | Approved                                                                     |
| 9. | Assessment, evaluation and identification of physical, biochemical and genetic factors affecting stallion fertility                                                      | ICAR | Thirumala Rao Talluri | Marwari, Manipuri, Zanskari stallions and Poitou and Indigenous Jacks (Min 3 of each and max 6 subject to availability) for blood collection only                                                                            | PI was not available for the meeting and hence project could not be taken up |

|     |                                                                                                                                                  |                          |              |                                  |           |
|-----|--------------------------------------------------------------------------------------------------------------------------------------------------|--------------------------|--------------|----------------------------------|-----------|
| 10. | Therapeutic potential of some plant extracts against tumors in equines                                                                           | ICAR                     | Ramesh Dedar | Only clinical case of horses- 12 | Approved* |
| 11. | Elucidating therapeutic role of bacteriophages and encoded endolysins against multidrug resistant enteric pathogens of poultry                   | ICAR                     | Taruna Anand | Poultry birds - 130              | Approved  |
| 12. | Development of bacteriophage repository and exploring the therapeutic potential of phages and their encoded endolysins                           | ICAR                     | Taruna Anand | BALB/c mice: 100                 | Approved  |
| 13. | Bacteriophage based therapeutics for MDR salmonellosis in poultry: A step towards mitigating antibiotics as well as microbes entering food chain | Proposed under DBT-BIRAC | Taruna Anand | Poultry birds - 130              | Approved  |

Note: The projects along with the proceedings with the \* mark are to be sent to Committee for Large animals for information.

  
(Harbans Lal)  
Main CPCSEA Nominee

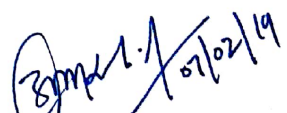  
(Anil Kamboj)  
(Non-Scientific Socially Aware Member)

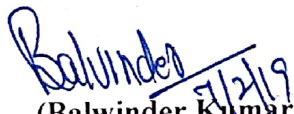  
(Balwinder Kumar)  
I/c Animal House

  
(R K Vaid)  
Scientist from different biological Discipline, Member Secretary

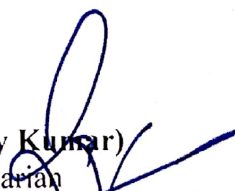  
(Sanjay Kumar)  
Veterinarian

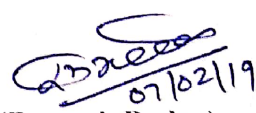  
(Ramesh Dedar)  
Scientist from different discipline

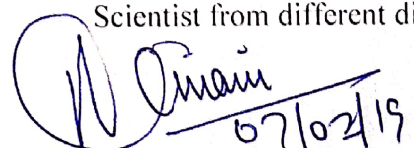  
(Nitin Virmani)  
Chairman, IAEC (ICAR-NRCE, Hisar)
